# Supplementary material for: Design and controllable synthesis of ethylenediamine-grafted ion imprinted magnetic polymers for highly selective adsorption to perchlorate
Source: Royal Society of Chemistry journal article supplement (doi:10.1039/c8ra06085a), 2018-01-01
Supplement: c8ra06085a1.pdf [file c8ra06085a1.pdf]

## Electronic Supplementary Material (ESI)

# Design and controllable synthesis of ethylenediamine-grafted ion imprinted magnetic polymers for highly selective adsorption to perchlorate

Haoyu Shen<sup>1,\*</sup>, Meina Sun<sup>2</sup>, Meiqin Hu<sup>1</sup>, Jinjin Cheng<sup>1</sup>

<sup>1</sup> Ningbo Institute of Technology, Zhejiang University; Ningbo, 315100, China

<sup>2</sup> Greentown Agricultural Testing Technology Co., Ltd; Hangzhou, 310052, China

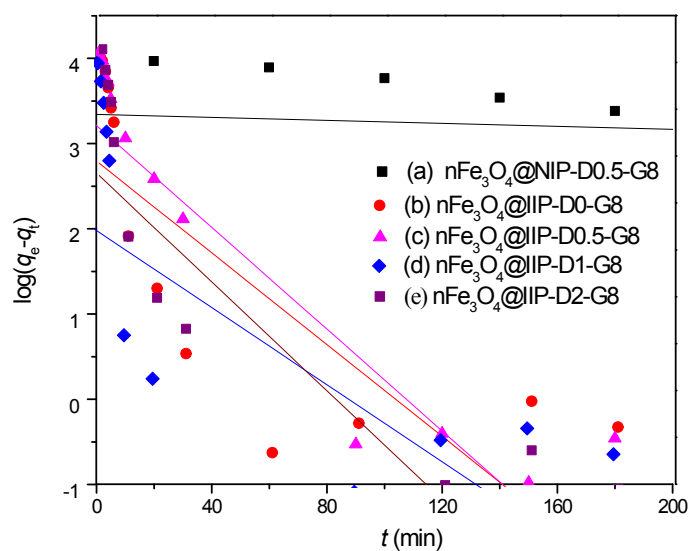

**Fig. S1** Pseudo-first-order fitting results for the adsorption kinetic data on the adsorption of  $\text{ClO}_4^-$  by  $\text{nFe}_3\text{O}_4@\text{NIP-D-0.5-G8}$  (a),  $\text{nFe}_3\text{O}_4@\text{IIPs}$  (with DVB varied (b)-(e))

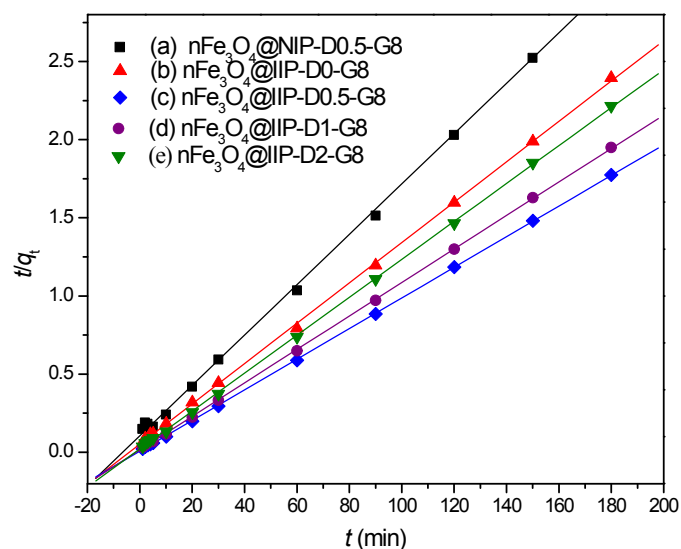

**Fig. S2** Pseudo-second-order model fitting results for the adsorption kinetic data on the adsorption of  $\text{ClO}_4^-$  by  $\text{nFe}_3\text{O}_4$ @NIP-D-0.5-G8 (a),  $\text{nFe}_3\text{O}_4$ @IIPs (with DVB varied (b)-(e))

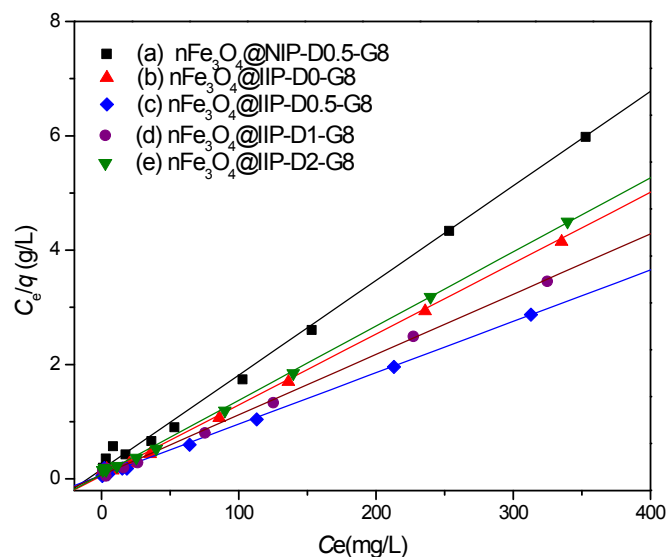

**Fig. S3** Langmuir adsorption model fitting results for the adsorption capacities data on the adsorption of  $\text{ClO}_4^-$  by  $\text{nFe}_3\text{O}_4$ @NIP-D-0.5-G8 (a),  $\text{nFe}_3\text{O}_4$ @IIPs (with DVB varied (b)-(e))

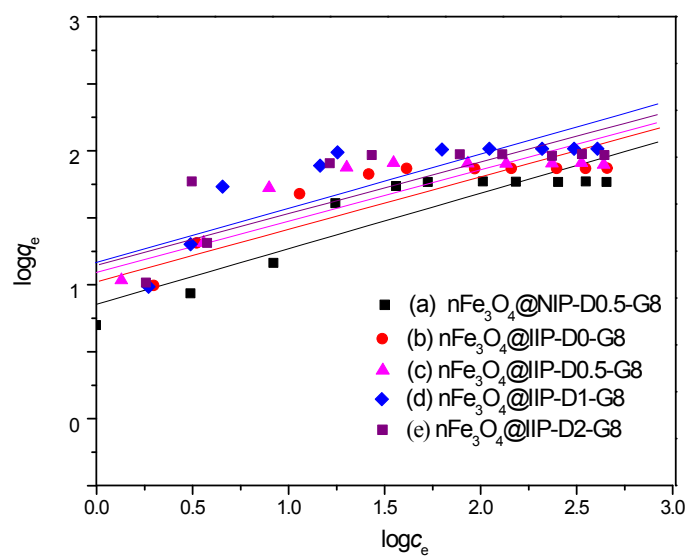

**Fig. S4** Freundlich adsorption model fitting results for the adsorption capacities data on the adsorption of  $\text{ClO}_4^-$  by  $n\text{Fe}_3\text{O}_4@\text{NIP-D-0.5-G8}$  (a),  $n\text{Fe}_3\text{O}_4@\text{IIPs}$  (with DVB varied (b)-(e))
